1 Insect immune specificity in a host-parasite model

2

3

4 C.E. Riddell<sup>1</sup>, J.D. Lobaton Garces<sup>1</sup>, S. Adams<sup>2</sup>, D.W. Twell<sup>1</sup> & E.B. Mallon<sup>1</sup>

5 <sup>1</sup>Department of Biology, University of Leicester, U.K.

6 <sup>2</sup> School of Life Sciences, University of Warwick, U.K.

7

8

9 Abstract

10 Ecological studies routinely show host-parasite genotype-genotype interactions in insect systems.  
11 The mechanisms behind these interactions are less clearly understood. Using the bumblebee  
12 *Bombus terrestris* / trypanosome *Crithidia bombi* model system, we have carried out a  
13 transcriptome-wide analysis of gene expression in bees during *C. bombi* infection. We have  
14 performed three analyses, comparing expression in infected and non-infected bees 24 hours after  
15 infection by *Crithidia bombi*, expression at 24 and 48 hours after *C. bombi* infection and finally  
16 looked for differential gene expression associated with the host-parasite genotype-genotype  
17 interaction at 24 hours after infection. We found a large number of genes differentially regulated  
18 belonging to numerous canonical immune pathways. These genes include receptors, signaling  
19 pathways and effectors. We found a possible interaction between the peritrophic membrane and the  
20 insect immune system in defense against *Crithidia*. Most interestingly we found differential  
21 expression of *Dscam* depending on the genotype-genotype interactions of the given bumblebee  
22 colony and *Crithidia* strain.  
23

24 Invertebrate immunity consists of a suite of complex recognition proteins and signalling pathways  
25 that regulate the induction of effector molecules against broad classes of parasites such as bacteria,  
26 fungi, viruses and microparasites [1]. Ecological studies of co-evolving host-parasite systems have  
27 shown that resistance to a parasite is highly variable in invertebrates, in part determined by  
28 interaction of the genotypes of the host and the parasite [2]. Studies with a number of natural, co-  
29 evolving host-parasite systems show that the specific combination of host and parasite genotype can  
30 predict susceptibility to specific strains of parasite [3–5].

31

32 However, how this level of specificity is generated is unclear. Specificity quantified by ecological  
33 measures of disease resistance (e.g., host mortality, fecundity and infection rate) cannot explicitly  
34 test whether the immune response produces this level of specificity [6]. For example, the bumblebee,  
35 *Bombus terrestris* / trypanosome, *Crithidia bombi* is a well studied example of these ecological host  
36 x parasite genotype interactions [7,8]. Even here it has been shown that independent of host  
37 genotype, specific isolates of gut microbiota from different hosts are protective against particular  
38 parasite genotypes [9].

39

40 Still there is evidence that the immune system must have a role in both protecting bumblebees  
41 against *Crithidia* and in generating a host-parasite specific response. A number of studies have  
42 found differential candidate immune genes expression in response to *Crithidia* [10–13]. Recently  
43 we have shown increased *Crithidia* loads in bees whose expression of antimicrobial peptides was  
44 knocked down by RNAi [14]. We have also shown that bees from different host genotypes induce  
45 differential expression of antimicrobial peptides, according to the strain of *C. bombi* they had been  
46 infected with [15], that is we found specificity in the immune response as measured by a limited  
47 number of effectors.

48

49 Understanding the source of insect immune specificity is an intriguing issue [16,17]. Such  
50 interactions can lead to the evolution and maintenance of genetic variation in natural populations  
51 [18]. On the practical side, many diseases of humans and their domesticated species use  
52 invertebrates, especially insects, as vectors [19]. Any effort to control these diseases will require a  
53 better understanding of the relationship between host and parasite.

54

55 Here, we expand our previous study and carry out a transcriptome-wide analysis of gene expression  
56 in bees during *C.bombi* infection. We have carried out three analyses, comparing a) expression in  
57 infected and non-infected bees 24 hours after infection by *Crithidia bombi* b) expression at 24 and  
58 48 hours after *C.bombi* infection and c) looked for differential gene expression associated with the  
59 host-parasite genotype-genotype interaction at 24 hours after infection. Enrichment analysis was  
60 also carried out on expression data to see which categories of molecules are differentially regulated  
61 during infection. The results confirm our previous findings of up-regulation in antimicrobial peptide  
62 expression and provide a comprehensive overview of changes in and the specificity of gene  
63 expression after exposure to 2 strains of *C.bombi*.

64

65

## 66 **Methods**

67 The samples used during this experiment are taken from Riddell *et al.* 2009 [15]. We have chosen  
68 samples that showed a reciprocal pattern of expression for the three antimicrobial peptides (AMPs)  
69 tested in that paper. These were colony K5 (called K from now on) and Q1 (Q) and strains 6 and 8.  
70 K-8 showed a high AMP expression, Q-8 a low expression level, Q-6 a high level and K-6 a low  
71 level of AMP expression.

## 72 **Sample Collection**

73 Experiments were carried out on one commercially reared bumblebee colony from Koppert  
74 Biological Systems U.K. (Colony K) and one colony from wild caught queens (Colony Q). All  
75 parasite isolates used originated from wild queens collected in Spring 2008 in the botanical gardens,  
76 University of Leicester. Experiments began when the colonies had a minimum of thirty workers,  
77 approximately four weeks old. Between observations, colonies were fed *ad libitum* with pollen  
78 (Percie du sert, France) and 50% diluted glucose/fructose mix (Meliose – Roquette, France). Before  
79 and during the experiments colonies were kept at 26°C and 60% humidity in constant red light.

## 80 **Infections**

81 To prepare *C. bombi* isolates, faeces was collected from workers of naturally infected colonies, and  
82 mixed with 50% diluted Meliose to create a standardized dose of 500 *Crithidia* cells per µl of  
83 inoculum. Previous studies had shown that such inocula, prepared from different colonies, are  
84 genotypically different [8] and generate specific responses in novel hosts [7]. We infected a sample  
85 of workers from each of K and Q bumblebee colonies (representing different host lines) with an  
86 inoculum of faeces from each of the two wild infected colonies (6 and 8 *Crithidia* strain). We also  
87 collected uninfected controls. Bees were four days old at the time of infection. After infection bees  
88 were kept in colony x strain groups (1–3 individuals depending on day collected) and fed *ad libitum*.  
89 24 hours or 48 hours post infection the bees were sacrificed by freezing in liquid nitrogen. They  
90 were then stored at –80°C.

## 91 ***RNA sample preparation and sequencing***

92 Total RNA was extracted from 23 individual homogenised abdomens using Tri-reagent (Sigma-  
93 Aldrich, UK). Any residual contaminants were removed from the RNA using the RNeasy mini kit  
94 (Qiagen, UK) and manufacturer's RNA clean-up protocol. To remove residual genomic DNA, RNA  
95 samples were treated with DNase (Sigma-Aldrich, UK). TruSeq RNA-seq libraries were made from  
96 the 23 samples at NBAF Edinburgh. Sequencing was performed on an Illumina HiSeq®2000  
97 instrument (Illumina, Inc.) by the manufacturer's protocol. Multiplexed 50 base single-read runs  
98 were carried out yielding an average of 12M reads per sample.

99

## 100 ***Statistical analysis***

101 The reference transcriptome was downloaded from  
102 [http://www.nematodes.org/downloads/databases/Bombus\\_terrestris/](http://www.nematodes.org/downloads/databases/Bombus_terrestris/) [20]. Functional annotation  
103 related to the transcriptome was obtained using the BLAST2GO package [21]. Alignment was done  
104 using GSNAP (version 2012-07-20) [22]. Only reads that mapped uniquely were selected for  
105 further analysis. Counts were generated per transcript for each sample.

106

107 Differential expression analysis was performed using the edgeR (3.4.0) package [23] in R (3.0.1)  
108 [24]. Normalization factors were computed using the TMM technique, after which tagwise  
109 dispersions were calculated and subjected to a generalized linear model (GLM). Resulting *p* values  
110 were subjected to Benjamini–Hochberg multiple testing correction to derive FDRs; only transcripts  
111 with a FDR  $< 0.05$  were considered for further analysis. Three separate GLMs were carried out,  
112 one looked for transcripts that are differentially expressed upon infection with *Crithidia* at 24 hours  
113 post-infection (~0+colony+infect(yes/no)) infect here are bees either infected with strain 6 or 8, one  
114 looking at the gene expression difference between 24 hours and 48 hours post strain 6 infection  
115 (~0+colony + time) and a further GLM that looked for transcripts that were expressed in a specific  
116 pattern at 24 hours post-infection (~0+colony\*strain).

117

118 Using Blast2Go, we then carried out an enrichment analysis (Fisher exact test) on each of these lists  
119 of differentially expressed genes to see which GO terms are overrepresented relative to the entire  
120 genome. We then used REVIGO to summarize and visualise these terms [25].

121

122 For each of the lists of differentially expressed transcripts we also carried out a blastx analysis  
123 against the insect innate immunity database (IID) [26]. We used the BLOSUM62 matrix with a  
124 word size of 3. The results were filtered to only contain hits with an *E*-value  $<1e-10$ , a bit score  $\geq 30$ ,

125

126

## 127 **Results**

### 128 *Genes differentially expressed at 24 hours post-infection*

129 31,843 unique transcripts were mapped to the transcriptome. 489 transcripts were found to be  
130 differentially expressed 24 hours post-infection (FDR < 0.05), 324 were downregulated and 165  
131 upregulated. Reannotating the transcripts using Blast2GO (blastx against the nr database with  $e <$   
132 0.001), 109 had no BLAST hits. A further 68 had uninformative BLAST hits (anonymous predicted  
133 protein). The remaining 312 were used in the enrichment analysis. Figure 1 shows a summary of the  
134 enriched GO terms found (Fisher's test  $p < 0.05$ ). Defense response (GO:0006952, FDR = 0.047)  
135 and chitin metabolism (GO:0006030, FDR = 0.032) were the only processes significantly enriched  
136 at a more stringent level (FDR < 0.05).

137

### 138 *Peritrophic membrane:*

139 The peritrophic matrix (PM) forms a layer composed of chitin and glycoproteins that lines the  
140 insect midgut lumen [27]. The PM facilitates digestion and forms a protective barrier to prevent the  
141 invasion of ingested pathogens [27,28]. Fibrillin 1 (BTT14121\_1), a venom protein precursor  
142 (BTT32193\_1), Neurotrypsin (BTT07956\_1), Peritrophin-1-like (BTT01709\_1, BTT22959\_1,  
143 BTT37215\_1, BTT42262\_1) and four chitinase transcripts (Chitinase 3: BTT23997\_1  
144 BTT38724\_1, Chitinase 4 BTT20684\_1, BTT23469\_1) are downregulated upon infection.  
145 Fibrillins are extracellular matrix macromolecules, ubiquitous in the connective tissues [29].  
146 BTT32193\_1 was classed as a venom protein, but was also very similar to Chitinase 3 (blastx  $e =$   
147  $1e^{-16}$ ). Chitinases modulate the structure and porosity of the PM [30]. Neurotrypsin is a serine  
148 protease expressed in the nervous system [31]. However in the protease domain it shares similarities  
149 with Sp22D, a chitin binding serine protease [32]. The chitin fibrils of the PM are assembled into a  
150 wide cross-hatched pattern connected by peritrophins [30]. A second group made up of Peritrophin-  
151 1 (BTT05886\_1, BTT20661\_1) and 3 further chitinase transcripts (Chitinase 2 :BTT23246\_1,  
152 Chitinase 3: BTT39163\_1, Chitinase 4: BTT05313\_1) is upregulated. Figure 2 shows the



153 correlation of expression patterns between these sixteen transcripts related to chitin metabolism.  
154 There is some clustering, but not of any clear functional groups. Taken together however, this  
155 differential expression suggests an important role for the repair or restructuring of the peritrophic  
156 matrix in the bumblebees' response to *Crithidia*.

157

158 When the BLAST searches against the IID and nr databases are combined, eighty nine transcripts  
159 relate to canonical insect immune genes. We describe them in the order receptors, serine proteases,  
160 signalling pathways and effectors [16].

161

162 *Receptors:*

163 The Down syndrome cell adhesion molecule (Dscam), a pattern recognition receptor has come to  
164 the forefront of research into insect immune specificity as it has been found to have thousands of  
165 different splice forms and is associated with insect immunity [33]. We found five downregulated  
166 transcripts annotated as immunoglobulin superfamily (*Dscam* included in hit list) (BTT03519\_1,  
167 BTT08682\_1, BTT15814\_1, BTT26724\_1, BTT27678\_1) and one upregulated transcript  
168 (BTT03519\_1).

169

170 *Serine proteases:*

171 Serine proteases are important proteolytic enzymes in many molecular pathways. When these serine  
172 proteases are no longer in need, they are inactivated by serine protease inhibitors [34]. CLIP domain  
173 serine proteases mediate insect innate immunity [35]. 8 transcripts corresponded to clip serine  
174 proteases (CLIPA6: BTT20125\_1, CLIP A7: BTT07313\_1, BTT31897\_1, CLIPD5: BTT10579\_1,  
175 BTT10912\_1, BTT18247\_1 BTT25711\_1, BTT06803\_1). All were downregulated. Another  
176 immune related serine protease SP27 (BTT08108\_1, BTT38696\_1) was also downregulated. The  
177 serine protease homologue SPH54 (BTT06125\_1) was downregulated. SP35 (BTT05300\_1), SP24  
178 (BTT03436\_1) and a different SPH 54 transcript (BTT01977\_1) were upregulated. Seven

179 transcripts (spn4: BTT04130\_1, BTT40693\_1, BTT41025\_1, BTT41461\_1, NEC-like:  
180 BTT31997\_1, and SRPN10: BTT04508\_1, BTT20259\_1) referring to serine protease inhibitors  
181 were downregulated. The *necrotic (nec)* gene encodes the serine protease inhibitor Nec. This  
182 controls a proteolytic cascade which activates the innate immune response to fungal and Gram  
183 positive bacterial infections [36]. Lipophorin receptor 2 (downregulated BTT34617\_1) binds with  
184 serpins to aid in their encytocytosis [37].

185

186 *Signalling pathways:*

187 We found a transcript for *Spatzle* (BTT19738\_1) downregulated at this time point. Activation of the  
188 Toll immune pathway requires the activation of *Spatzle* [1]. MyD88 (upregulated BTT15687\_1) is a  
189 death domain-containing adaptor activated by Toll leading to the activation of *Pelle*. *Dorsal*  
190 (BTT25273\_1) was also downregulated. The nuclear translocation of Dorsal, a member of the NF-  
191 kB family, in the Toll pathway induces the expression of many immune genes. We found an  
192 upregulated transcript (BTT09662\_1) for *Helicase89B* part of the Toll and Imd Pathway. It is  
193 required downstream of NF-kB for the activation of AMP genes in *Drosophila melanogaster* [38].  
194 *ird5* codes for a catalytic subunit of an IkappaB kinase that cleaves Relish. Relish (Imd pathway) is  
195 an essential regulator of antimicrobial peptide gene induction. We found *ird5* (BTT03904\_1) to be  
196 downregulated 24 hours post-infection.

197

198 In mammals semaphorins are crucially involved in various aspects of the immune response [39]. A  
199 semaphorin-5A-like transcript (BTT01850\_1) was downregulated 24 hours post-infection.  
200 Semaphorin regulates the activity of Ras-family small GTPases [39]. A Ras-like protein11B  
201 transcript (BTT05368\_1) was also down regulated. The Ras/MAPK pathway was found to be  
202 essential for the suppression of the Imd immune pathway in *Drosophila* [40].

203

204 The downregulated Drumstick (BTT13062\_1) interacts with the JAK/STAT pathway during its'

205 development role [41], but we could not find any information about its immune role. Two  
206 transcripts (BTT11590\_1, BTT14205\_1) of *Puckered* were downregulated. *Puckered*, which codes  
207 for a dual specificity phosphatase, is a key regulator of the c-Jun-N-terminal kinase (JNK) immune  
208 pathway [42]. Mpk2/p38a (downregulated BTT05769\_1) is involved in the JNK Pathway and  
209 JAK/STAT Pathway. Heat-shock factor activation by p38 is a recently discovered part of  
210 antimicrobial reactions in flies [43]. We found two heat shock protein transcripts (BTT23758\_2,  
211 BTT37030\_1) and one other (BTT17701\_1) that were downregulated and upregulated respectively.  
212 These are all involved in the JAK/STAT pathway.

213

214 *Effectors:*

215 Our previous paper [10] found that antimicrobial peptides were upregulated at 24 hours post-  
216 infection. We would expect the same to be true here. Indeed, we found 5 transcripts for defensin  
217 (BTT06274\_2, BTT8490\_1, BTT10405\_1, BTT14019\_1, and BTT42034\_1) and 3 transcripts for  
218 hymenoptaecin (BTT18071\_1, BTT24170\_1, BTT24170\_2), all upregulated. An apidaecin  
219 precursor (BTT33652\_1) was downregulated. Apidaecin has recently been shown to be expressed  
220 in bumblebees [20]. The downregulated beta-amyloid-like protein (BTT20240\_1) has been shown  
221 to be an antimicrobial peptide in mammals [44]. Hemolectin (BTT15326\_1, upregulated) is a  
222 clotting protein known to have a role against gram negative bacteria [45].

223

224 Reactive oxygen species (ROS) are generated by respiration in the mitochondria or as part of the  
225 immune response [46]. P450 cytochromes are oxidases acting terminally in monooxygenase  
226 systems [47]. Some are regulated in response to infection possibly either as direct immune  
227 responders [48], producing nitric oxide (NO) or other reactive oxygen radicals or as part of the host  
228 detoxification process decreasing oxidative stress after an infection [46]. A number of *cytochromes*  
229 *P450* were differentially expressed 24 hours post infection. Ten cytochrome p450 transcripts  
230 (*Cyp4p3*: BTT05294\_1, BTT20848\_1, BTT22253\_1, BTT23317\_1, BTT32674\_1, *cytochrome*

231 *P450 4g15*: BTT23811\_1, BTT32459\_1, *cytochrome P450 6k1*: BTT35547\_1, BTT40653\_1,  
232 *cytochrome P450 6a14*: BTT38445\_1) were found to be downregulated. Three other *cytochrome*  
233 *P450* transcripts (*Cyp4p3*: BTT21216\_1, BTT35543\_1, *cytochrome P450 315a1*: BTT26726\_1)  
234 were upregulated. Several other cytochromes (*cytochrome b*: BTT20524\_1, BTT39776\_1,  
235 BTT41896\_1, and *cytochrome c*: BTT05255\_2) were downregulated.

236

237 Numerous other actors in the production of ROS were found to be differentially expressed. *TPX4*  
238 (BTT13285\_1), coding for a Thioredoxin-dependent peroxidase, was downregulated. This gene was  
239 found to be differentially expressed during *Plasmodium* infection in *Anopheles gambiae* [49].  
240 Thioredoxin-dependent peroxidase detoxifies H<sub>2</sub>O<sub>2</sub>. Calcineurin (BTT08150\_1, BTT26273\_1) was  
241 found to be downregulated 24 hours post-infection. This agrees with our previous findings [10]. In  
242 infected *D. melanogaster* larvae, NO signals are enhanced by Calcineurin to promote induction of  
243 strong, robust immune responses via the Imd signalling pathway [50].

244

245 We found downregulation of sortilin-related receptor-like (BTT31654\_1). In mammals, sortilin aids  
246 in phagocytosis [51]. Two downregulated transcripts (BTT35021\_1, BTT08756\_1) were matched to  
247 *croquemort*. *Croquemort*, which codes for a scavenger receptor is a key part of the Imd pathway  
248 but in its apoptotic phagocytosis role not its immune one [52]. Annexin IX (downregulated  
249 BTT02025\_1) has been shown to be induced by septic injury in *Drosophila*. It is thought to encode  
250 for an anticoagulant [53].

251

252 *Miscellaneous:*

253 Major royal jelly protein (BTT05317\_2, BTT36365\_1 upregulated) has been shown to have  
254 antimicrobial properties and to be expressed in response to bacterial infection in honeybees [54,55].  
255 Vitellogenin (downregulated BTT36006\_1) is a potent regulator of the immune response in  
256 honeybees [56]. Several orthologs of putative *Drosophila* immune loci were found to be

257 differentially expressed 24 hours post-infection (CG12505: BTT00934\_1, CG18348: BTT04397\_1,  
258 CG7296: BTT15035\_1, BTT18395\_1, CG8791: BTT18908\_1, CG5527: BTT35653\_1, Fst:  
259 BTT11511\_1). The downregulated CG4393 (BTT05817\_1) is weakly analogous to TNF receptor  
260 associated factor 3 (TRAF3) that mediates signal transduction involved in mammalian immune  
261 responses. Downregulated BTT37289\_1 codes for a putative fatty acyl-CoA reductase.

262

### 263 ***Genes differentially expressed between 24 hours post-infection and 48 hours post-infection***

264 43 transcripts were found to be differentially expressed between 24 hours post-infection and 48  
265 hours post-infection. Of these 17 had no BLAST hits. A further six had uninformative BLAST hits  
266 (anonymous predicted protein). The remaining 20 were used in the analysis. Defense response was  
267 the only GO term significantly enriched (FDR= 0.00015), with seven transcripts. Three transcripts  
268 correspond to Hymenoptaecin (BTT18071\_1, BTT24170\_1, BTT24170\_2). They were all  
269 upregulated. This suggests a continuing strong AMP production 48 hours after infection. This  
270 agrees with other immune assays in bumblebees [57]. Argonaute-2, a RNA-silencing endonuclease,  
271 is involved in antiviral defense in insects (downregulated BTT02484\_1) [58]. GstD8, a glutathione  
272 S-transferase, is involved in the detoxification process (upregulated BTT04810\_1) [59]. Dopa  
273 decarboxylase (upregulated BTT28048\_1) converts L-dopa to dopamine during the melanisation  
274 process [60]. SCR-B9 (upregulated BTT40924\_1) codes for a scavenger receptor protein.  
275 Scavenger receptor proteins have been found to be microbial pattern recognition receptors in flies  
276 [61].

### 277 **Genes differentially expressed depending on host genotype – parasite genotype interactions**

278 There were 591 differentially expressed transcripts (FDR < 0.05). Reannotating the transcripts  
279 using Blast2GO (blastx against the nr database with  $e < 0.001$ ), 150 had no BLAST hits. A further  
280 64 had uninformative BLAST hits (anonymous predicted protein). There were 109 transcripts that  
281 had previously been found to be differentially expressed at 24 hours post infection. Figure 3 shows

282 a multidimensional scaling (MDS) plot of the samples based on the expression of these 591 genes.

283 It can be clearly seen that the 11 samples are grouped into their colony-strain interaction.

284

285 Of the 591 transcripts, 132 were upregulated and 459 were downregulated. Up or downregulation

286 does not have the same meaning here as in the infected versus uninfected model were there was a

287 clear baseline (uninfected). Depending on how you order the GLM we could get the reciprocal

288 result. Our model used colony K strain 8 as the final contrast. From our previously published qPCR

289 data [15], we know the colony K strain 8 interaction displayed the highest levels of AMPs

290 (effectors). Therefore when we say a transcript is upregulated, we mean it is upregulated in this high

291 immune response interaction.

292

293 As with the infection data, we combined the BLAST searches against the IID and nr databases.

294 Ninety transcripts correspond to canonical insect immune genes. We again describe them in the

295 order receptors, serine proteases, signalling pathways and effectors [16].

296

297 *Receptors:*

298 Two transcripts were associated with gram negative binding proteins (upregulated GGBP,

299 BTT03533\_1 and downregulated *GNBP1-2* BTT35513\_1) Although, as their name suggests,

300 GNBP are most associated with defense against gram negative bacteria, they have been show to

301 have a role in respond to *Plasmodium* infections [62]. C-type lectins (CTLs) bind carbohydrates and

302 mediate processes including pathogen recognition [63]. CTL4 is agonist to *Plasmodium* infections

303 in mosquitoes [63]. A CTL4 transcript (BTT29328\_1) was found to be downregulated.

304

305 One downregulated transcript was related to *Dscam* (BTT12755\_1). A further fourteen

306 downregulated transcripts were part of the Ig superfamily (IGFn3-1: BTT05561\_1, BTT05581\_1,

307 BTT08682\_1, BTT12655\_1, BTT13442\_1, BTT14516\_1, BTT18750\_1, BTT21156\_1,

308 BTT22598\_1, BTT22819\_1, BTT23339\_1, BTT24070\_1, IGFn3-7: BTT08109\_1, BTT09498\_1)  
309 and one was upregulated (IGFn3-8: BTT03519\_1). *Dscam* and most of the other Ig superfamily  
310 transcripts cluster together in the top right of figure 4, suggesting they are similarly expressed.

311

312 *Serine proteases:*

313 28 transcripts related to serine proteases, serine protease homologues or serine protease inhibitors  
314 were differentially expressed. Twelve serine protease transcripts were upregulated (*cSp3*:  
315 BTT35293\_1, *Sp18*: BTT20808\_1, *Tequilla/GRAL/Sp23*: BTT01709\_1, BTT05886\_1,  
316 BTT09081\_1, BTT20661\_1, BTT20725\_1, BTT24359\_1, BTT25071\_1, *Sp27*: BTT40251\_1,  
317 *Sp35*: BTT05300\_1, *Sp40*: BTT15256\_1). Six serine protease transcripts were downregulated  
318 (*cSP3*: BTT10579\_1, BTT10912\_1, BTT18247\_1, BTT25711\_1, *Sp28*: BTT20637\_1, *Sp35*:  
319 *BTT10155\_1*). Two serine protease homologues were downregulated (*Sph54*: BTT27769\_1,  
320 *cSPH39*: BTT21868\_1). One serine protease homologue was upregulated (*Sph56*: BTT17814\_1)  
321 Six serine protease inhibitor transcripts were downregulated (*Spn 4*: BTT04130\_1, *SRPN10*:  
322 BTT02607\_1, BTT4508\_1, BTT20259\_1, BTT40693\_1, Kunitz ser-protease inhibitor:  
323 BTT14993\_1). The *necrotic (nec)* gene was upregulated (BTT35742\_1).

324

325 *Signalling pathways:*

326 The Toll-like receptor *18Wheeler* (BTT35732\_1) was upregulated as was *Toll 10* (BTT09386\_1).  
327 *18Wheeler* has been shown to be important in the anti gram-negative immune response in  
328 *Drosophila* larvae [64]. *Dorsal 1A* (BTT04010\_1), a transcription factor that is a fundamental part  
329 of the Toll pathway, was downregulated. A transcript for *Spatzle 1-2* was downregulated  
330 (BTT10679\_1).

331

332 The tyrosine kinase *Pvr* (BTT04822\_1), which inhibits JNK activation [65] was downregulated. Jun,  
333 a transcription factor of the JNK pathway was downregulated (BTT13636\_1). *Mpk2/p38a*

334 (downregulated BTT16580\_1) and MAPKKK9 (downregulated BTT04404\_1) are mitogen-  
335 activated protein kinases involved in the JNK Pathway and JAK/STAT pathways. We found two  
336 heat shock protein transcripts (BTT17371\_1, BTT22195\_1) and one other (BTT17701\_1) that were  
337 downregulated and upregulated respectively. These are all involved in the JAK/STAT pathway. *Akt*  
338 *I* (downregulated BTT14188\_1) is part of the insulin/insulin-like growth factor 1 signaling (IIS)  
339 cascade. IIS plays a critical role in the regulation of innate immunity. Activation of *Akt* signaling  
340 leads to a decrease in malaria infection intensity in mosquitoes [66].

341

342 *Effectors:*

343 Five transcripts relate to the AMPs *defensin* (BTT06274\_2, BTT42034\_1) and hymenoptaecin  
344 (BTT18071\_1, BTT24170\_1, BTT24170\_2). They were all upregulated. An apidaecin precursor  
345 (BTT20828\_1) was upregulated. Hemolactin had three downregulated transcripts (BTT14194\_1,  
346 BTT17013\_1, BTT26614\_1) and one upregulated (BTT15326\_1). Argonaute-2, a RNA-silencing  
347 endonuclease, is involved in antiviral defense in insects (downregulated BTT02374\_1) [58].

348

349 *Eater* encodes for a transmembrane receptor involved in phagocytosis in *Drosophila* [67]. A  
350 transcript (BTT11132\_1) relating to *Eater* was upregulated. The melanisation process component  
351 Dopa decarboxylase (BTT19093\_1) was upregulated. Another enzyme involved in melanisation,  
352 laccase was found to be downregulated (BTT20241\_1, BTT33633\_1) [68].

353

354 *Cyp4p3* transcript BTT40653\_1 was upregulated. Two previously unseen *Cyp4p3* transcripts  
355 (BTT05254\_1, BTT20622\_2) were upregulated and one (BTT36257\_1) downregulated. *TPX4*  
356 (BTT13285\_1) that codes for a Thioredoxin-dependent peroxidase was downregulated.

357

358 *Miscellaneous:*

359 A small number of transcripts were related to chitin metabolism. SCRASP1 has a chitin-binding



360 domain that has been hypothesized to sense chitin in response to injury and to transduce signals via  
361 the serine protease domain [69]. We found an upregulated transcript related to *SCRASP 1*  
362 (BTT41923\_1). A peritrophin precursor was also upregulated (BTT10727\_1). As was a chitinase 3  
363 transcript (BTT23246\_1).

364

365 *Retinoid and fatty-acid-binding protein (RfaBp)* (BTT07678\_1) was downregulated. RfaBp was  
366 found to be upregulated upon injection of LPS in *Drosophila* during a proteomic study [70]  
367 (Vierstraete *et al.* 2004). *Notch* (upregulated BTT09545\_1) is involved in the specification of  
368 crystal cells in *Drosophila melanogaster* [71]. Several orthologs of putative *Drosophila* immune  
369 loci were found to be differentially expressed (CG5527: BTT08512\_1, CG12505: BTT00934\_1,  
370 CG13323: BTT38025\_1, BTT38087\_1, CG17560: BTT02877\_1 downregulated, BTT05845\_1  
371 upregulated, CG18348: BTT20843\_1)

372

373 **Discussion**

374 We present a comprehensive transcriptomic analysis of gene expression in this important model  
375 host-parasite system. We have identified a large number of bumblebee genes whose expression is  
376 changed upon infection with *Crithidia*. We have also found a large number of genes whose  
377 expression depends on the interaction between host and parasite genotypes that is show specificity.

378

379 We confirmed the importance of antimicrobial peptides in the specific defense against *Crithidia*  
380 [10,14,15]. It is also clear that several other effectors including ROS and phagocytosis may be  
381 important. Several immune pathways seem to be important in the anti-*Crithidia* response. These  
382 include the Toll, Imd and JAK/STAT pathways. Toll especially seems to be important in a specific  
383 immune response.

384

385 There are a larger proportion of receptor transcripts found in the specificity analysis (3.2% 19/591)  
386 compared to the infection analysis (1.2% 6/489). This is not surprising, as we would expect a  
387 specific immune response to a given strain to be based mainly on how it is recognised. Although  
388 several receptors, including GNBPs and lectins, are differentially expressed, the most exciting  
389 discovery is the large number of transcripts related to *Dscam*. The Down syndrome cell adhesion  
390 molecule (*Dscam*), a pattern recognition receptor has come to the forefront of research into insect  
391 immune specificity as it has been found to have thousands of different splice forms and is  
392 associated with insect immunity [33]. In the fruit fly *Drosophila*, silencing of *Dscam* retards the  
393 insect's capacity to engulf bacteria by phagocytosis [72]. In *Anopheles*, the *Dscam* splice forms  
394 produced in response to parasite exposure differs between bacteria and *Plasmodium* and between  
395 *Plasmodium berghei* and *Plasmodium falciparum* [73]. This has been tempered by the finding that  
396 *Dscam* diversity does not increase with exposure to increasing heterogeneity of *Plasmodium*  
397 *falciparum* genotypes [33]. Recently it has been shown that *Dscam* specificity is mediated by  
398 specific splice-factors transcription downstream of activation of the Toll and Imd pathways [74].

399 Our results suggest that *Dscam* may be important in differentiating strains of the trypanosome  
400 *Crithidia bombi*.

401

402 We found a number of genes associated with chitin metabolism. The peritrophic matrix may be  
403 fundamental in the bee's defense against *Crithidia*. The peritrophic matrix acts as an immunological  
404 barrier against trypanosomes. Tsetse flies with an underdeveloped PM have lower levels of  
405 refractoriness to trypanosome infections [75]. This is due to a premature immune response; the  
406 trypanosomes get through the PM quicker and stimulate the immune response at an earlier stage  
407 compared to refractory flies.

408

409 Given that we have found that the bees own physiology, especially its immune response is vital in  
410 both the defense against *Crithidia* and in explaining the host-parasite specificity, how do we  
411 incorporate recent findings that the bees gut microbiota are vital in exactly these phenomena [9,76].  
412 Gut microbiota impact the condition of the PM and gut epithelium generally [75,77]. It has recently  
413 been suggested that the components of the peritrophic matrix may be under the control of various  
414 immune pathways, Imd [78] and STAT [79] explicitly. Gut microbiota stimulate these pathways  
415 keeping the PM intact. The intact peritrophic matrix then acts as a physical barrier to colonization  
416 by parasites. Future work will focus on understanding the interactions of this triumvirate of host  
417 genotype, parasite genotype and gut microbiota and their effect on disease outcome.

418

419 Acknowledgements

420 Thanks to S. Barribeau & P. Schmid-Hempel for discussions. CR was funded by a BBSRC  
421 studentship. This work was partially funded through a NERC NBAF pilot grant (NBAF606) to  
422 EBM.

423

424

425

426

## 427 References

1. Lemaitre, B. & Hoffmann, J. 2007 The host defense of *Drosophila melanogaster*. *Annu. Rev. Immunol.* **25**, 697–743.
2. Dybdahl, M. F. & Lively, C. M. 1998 Host-parasite coevolution: Evidence for rare advantage and time-lagged selection in a natural population. *Evolution* **52**, 1057–1066.
3. Carius, H. J., Little, T. J. & Ebert, D. 2001 Genetic variation in a host-parasite association: Potential for coevolution and frequency-dependent selection. *Evolution* **55**, 1136–1145.
4. Schmid-Hempel, P. 2001 On the evolutionary ecology of host-parasite interactions: addressing the question with regard to bumblebees and their parasites. *Naturwissenschaften* **88**, 147–158.
5. Lambrechts, L. 2010 Dissecting the Genetic Architecture of Host-Pathogen Specificity. *PLOS Pathog.* **6**.
6. Hauton, C. & Smith, V. J. 2007 Adaptive immunity in invertebrates: a straw house without a mechanistic foundation. *Bioessays* **29**, 1138–1146.
7. Schmid-Hempel, P., Puhr, K., Kruger, N., Reber, C. & Schmid-Hempel, R. 1999 Dynamic and genetic consequences of variation in horizontal transmission for a microparasitic infection. *Evolution* **53**, 426–434.
8. Schmid-Hempel, P. & Reber-Funk, C. 2004 The distribution of genotypes of the trypanosome parasite, *Crithidia bombi*, in populations of its host *Bombus terrestris*. *Parasitology* **129**, 147–158.
9. Koch, H. & Schmid-Hempel, P. 2012 Gut microbiota instead of host genotype drive the specificity in the interaction of a natural host-parasite system. *Ecol. Lett.* **15**, 1095–1103. (doi:10.1111/j.1461-0248.2012.01831.x)
10. Riddell, C. E., Sumner, S., Adams, S. & Mallon, E. B. 2011 Pathways to immunity: Temporal dynamics of the bumblebee (*Bombus terrestris*) immune response against a trypanosomal gut parasite. *Insect Mol. Biol.* **20**, 529–540. (doi:10.1111/j.1365-2583.2011.01084.x)
11. Schlüns, H., Sadd, B. M., Schmid-Hempel, P. & Crozier, R. H. 2010 Infection with the trypanosome *Crithidia bombi* and expression of immune-related genes in the bumblebee *Bombus terrestris*. *Dev. Comp. Immunol.* **34**, 705–709. (doi:10.1016/j.dci.2010.02.002)
12. Brunner, F. S., Schmid-Hempel, P. & Barribeau, S. M. 2013 Immune Gene Expression in *Bombus terrestris*: Signatures of Infection Despite Strong Variation among Populations, Colonies, and Sister Workers. *PLoS ONE* **8**, e68181. (doi:10.1371/journal.pone.0068181)
13. Barribeau, S. M. & Schmid-Hempel, P. In press. Qualitatively different immune response of the bumblebee host, *Bombus terrestris*, to infection by different genotypes of the trypanosome gut parasite, *Crithidia bombi*. *Infect. Genet. Evol.* (doi:10.1016/j.meegid.2013.09.014)
14. Deshwal, S. & Mallon, E. B. 2014 Antimicrobial peptides play a functional role in bumblebee anti-trypanosome defense. *Dev. Comp. Immunol.* **42**, 240–243. (doi:10.1016/j.dci.2013.09.004)
15. Riddell, C., Adams, S., Schmid-Hempel, P. & Mallon, E. B. 2009 Differential Expression of Immune Defences Is Associated with Specific Host-Parasite Interactions in Insects. *PLoS ONE*

- 4, e7621.
16. Schmid-Hempel, P. 2005 Natural insect host-parasite systems show immune priming and specificity: puzzles to be solved. *Bioessays* **27**, 1026–1034.
  17. Kurtz, J. 2005 Specific memory within innate immune systems. *Trends Immunol.* **26**, 186–192.
  18. Hamilton, W. D., Henderson, P. A. & Moran, N. A. 1981 Fluctuation of environment and coevolved antagonist polymorphism as factors in the maintenance of sex. In *Natural Selection and Social Behavior* (eds R. D. Alexander & D. W. Tinkle), pp. 363–381. New York: Chiron Press.
  19. Jacobslorena, M. & Lemos, F. J. A. 1995 Immunological Strategies for Control of Insect Disease Vectors - a Critical-Assessment. *Parasitol. Today* **11**, 144–147.
  20. Colgan, T. J., Carolan, J. C., Bridgett, S. J., Sumner, S., Blaxter, M. L. & Brown, M. J. 2011 Polyphenism in social insects: insights from a transcriptome-wide analysis of gene expression in the life stages of the key pollinator, *Bombus terrestris*. *BMC Genomics* **12**, 623. (doi:10.1186/1471-2164-12-623)
  21. Götz, S. et al. 2008 High-throughput functional annotation and data mining with the Blast2GO suite. *Nucleic Acids Res.* **36**, 3420–3435. (doi:10.1093/nar/gkn176)
  22. Wu, T. D. & Nacu, S. 2010 Fast and SNP-tolerant detection of complex variants and splicing in short reads. *Bioinforma. Oxf. Engl.* **26**, 873–881. (doi:10.1093/bioinformatics/btq057)
  23. McCarthy, D. J., Chen, Y. & Smyth, G. K. 2012 Differential expression analysis of multifactor RNA-Seq experiments with respect to biological variation. *Nucleic Acids Res.* **40**, 4288–4297.
  24. R Core Team 2013 *R: A language and environment for statistical computing*. Vienna, Austria: R foundation for statistical computing.
  25. Supek, F., Bošnjak, M., Škunca, N. & Šmuc, T. 2011 REVIGO Summarizes and Visualizes Long Lists of Gene Ontology Terms. *PLoS ONE* **6**, e21800. (doi:10.1371/journal.pone.0021800)
  26. Brucker, R. M., Funkhouser, L. J., Setia, S., Pauly, R. & Bordenstein, S. R. 2012 Insect Innate Immunity Database (IID): An Annotation Tool for Identifying Immune Genes in Insect Genomes. *PLoS ONE* **7**, e45125. (doi:10.1371/journal.pone.0045125)
  27. Kuraishi, T., Binggeli, O., Opota, O., Buchon, N. & Lemaitre, B. 2011 Genetic evidence for a protective role of the peritrophic matrix against intestinal bacterial infection in *Drosophila melanogaster*. *Proc. Natl. Acad. Sci. U. S. A.* **108**, 15966–15971. (doi:10.1073/pnas.1105994108)
  28. Lehane, M. J. 1997 Peritrophic matrix structure and function. *Annu. Rev. Entomol.* **42**, 525–550. (doi:10.1146/annurev.ento.42.1.525)
  29. Isogai, Z. et al. 2003 Latent transforming growth factor  $\beta$ -binding protein 1 interacts with fibrillin and is a microfibril-associated protein. *J. Biol. Chem.* **278**, 2750–2757. (doi:10.1074/jbc.M209256200)
  30. Dinglasan, R. R., Devenport, M., Florens, L., Johnson, J. R., McHugh, C. A., Donnelly-Doman, M., Carucci, D. J., Yates III, J. R. & Jacobs-Lorena, M. 2009 The *Anopheles gambiae* adult midgut peritrophic matrix proteome. *Insect Biochem. Mol. Biol.* **39**, 125–134.

(doi:10.1016/j.ibmb.2008.10.010)

31. Gschwend, T. P., Krueger, S. R., Kozlov, S. V., Wolfer, D. P. & Sonderegger, P. 1997 Neurotrypsin, a Novel Multidomain Serine Protease Expressed in the Nervous System. *Mol. Cell. Neurosci.* **9**, 207–219. (doi:10.1006/mcne.1997.0616)
32. Danielli, A., Loukeris, T. G., Lagueux, M., Müller, H.-M., Richman, A. & Kafatos, F. C. 2000 A modular chitin-binding protease associated with hemocytes and hemolymph in the mosquito *Anopheles gambiae*. *Proc. Natl. Acad. Sci.* **97**, 7136–7141. (doi:10.1073/pnas.97.13.7136)
33. Smith, P. H., Mwangi, J. M., Afrane, Y. A., Yan, G., Obbard, D. J., Ranford-Cartwright, L. C. & Little, T. J. 2011 Alternative splicing of the *Anopheles gambiae* Dscam gene in diverse *Plasmodium falciparum* infections. *Malar. J.* **10**, 156. (doi:10.1186/1475-2875-10-156)
34. Zhao, P., Dong, Z., Duan, J., Wang, G., Wang, L., Li, Y., Xiang, Z. & Xia, Q. 2012 Genome-Wide Identification and Immune Response Analysis of Serine Protease Inhibitor Genes in the Silkworm, *Bombyx mori*. *PLoS ONE* **7**, e31168. (doi:10.1371/journal.pone.0031168)
35. Zou, Z., Lopez, D. L., Kanost, M. R., Evans, J. D. & Jiang, H. 2006 Comparative analysis of serine protease-related genes in the honey bee genome: possible involvement in embryonic development and innate immunity. *Insect Mol. Biol.* **15**, 603–614. (doi:10.1111/j.1365-2583.2006.00684.x)
36. Levashina, E. A., Langley, E., Green, C., Gubb, D., Ashburner, M., Hoffmann, J. A. & Reichhart, J.-M. 1999 Constitutive Activation of Toll-Mediated Antifungal Defense in Serpin-Deficient *Drosophila*. *Science* **285**, 1917–1919. (doi:10.1126/science.285.5435.1917)
37. Soukup, S. F., Culi, J. & Gubb, D. 2009 Uptake of the Necrotic Serpin in *Drosophila melanogaster* via the Lipophorin Receptor-1. *PLoS Genet* **5**, e1000532. (doi:10.1371/journal.pgen.1000532)
38. Yagi, Y. & Ip, Y. T. 2005 Helicase89B is a Mot1p/BTAF1 homologue that mediates an antimicrobial response in *Drosophila*. *EMBO Rep.* **6**, 1088–1094. (doi:10.1038/sj.embor.7400542)
39. Takamatsu, H. & Kumanogoh, A. 2012 Diverse roles for semaphorin–plexin signaling in the immune system. *Trends Immunol.* **33**, 127–135. (doi:10.1016/j.it.2012.01.008)
40. Ragab, A., Buechling, T., Gesellchen, V., Spirohn, K., Boettcher, A.-L. & Boutros, M. 2011 *Drosophila* Ras/MAPK signalling regulates innate immune responses in immune and intestinal stem cells. *EMBO J.* **30**, 1123–1136. (doi:10.1038/emboj.2011.4)
41. Johansen, K. A., Iwaki, D. D. & Lengyel, J. A. 2003 Localized JAK/STAT signaling is required for oriented cell rearrangement in a tubular epithelium. *Development* **130**, 135–145. (doi:10.1242/dev.00202)
42. Karkali, K. & Panayotou, G. 2012 The *Drosophila* DUSP Puckered is phosphorylated by JNK and p38 in response to arsenite-induced oxidative stress. *Biochem. Biophys. Res. Commun.* **418**, 301–306. (doi:10.1016/j.bbrc.2012.01.015)
43. Chen, J., Xie, C., Tian, L., Hong, L., Wu, X. & Han, J. 2010 Participation of the p38 pathway in *Drosophila* host defense against pathogenic bacteria and fungi. *Proc. Natl. Acad. Sci.* **107**, 20774–20779. (doi:10.1073/pnas.1009223107)



44. Soscia, S. J. et al. 2010 The Alzheimer's Disease-Associated Amyloid  $\beta$ -Protein Is an Antimicrobial Peptide. *PLoS ONE* **5**, e9505. (doi:10.1371/journal.pone.0009505)
45. Lesch, C., Goto, A., Lindgren, M., Bidla, G., Dushay, M. S. & Theopold, U. 2007 A role for Hemolectin in coagulation and immunity in *Drosophila melanogaster*. *Dev. Comp. Immunol.* **31**, 1255–1263. (doi:10.1016/j.dci.2007.03.012)
46. Molina-Cruz, A., DeJong, R. J., Charles, B., Gupta, L., Kumar, S., Jaramillo-Gutierrez, G. & Barillas-Mury, C. 2008 Reactive oxygen species modulate *Anopheles gambiae* immunity against bacteria and *Plasmodium*. *J. Biol. Chem.* **283**, 3217–3223. (doi:10.1074/jbc.M705873200)
47. Felix, R. & Silveira, H. 2012 The Role of *Anopheles gambiae* P450 Cytochrome in Insecticide Resistance and Infection. In *Insecticides - Pest Engineering*, InTech.
48. Vlachou, D., Schlegelmilch, T., Christophides, G. K. & Kafatos, F. C. 2005 Functional genomic analysis of midgut epithelial responses in *Anopheles* during *Plasmodium* invasion. *Curr. Biol. CB* **15**, 1185–1195. (doi:10.1016/j.cub.2005.06.044)
49. Baton, L. A., Robertson, A., Warr, E., Strand, M. R. & Dimopoulos, G. 2009 Genome-wide transcriptomic profiling of *Anopheles gambiae* hemocytes reveals pathogen-specific signatures upon bacterial challenge and *Plasmodium berghei* infection. *BMC Genomics* **10**, 257. (doi:10.1186/1471-2164-10-257)
50. Dijkers, P. F. & O'Farrell, P. H. 2007 *Drosophila* Calcineurin Promotes Induction of Innate Immune Responses. *Curr. Biol.* **17**, 2087–2093. (doi:10.1016/j.cub.2007.11.001)
51. Wähe, A., Kasmapour, B., Schmaderer, C., Liebl, D., Sandhoff, K., Nykjaer, A., Griffiths, G. & Gutierrez, M. G. 2010 Golgi-to-phagosome transport of acid sphingomyelinase and prosaposin is mediated by sortilin. *J. Cell Sci.* **123**, 2502–2511. (doi:10.1242/jcs.067686)
52. Franc, N. C., Heitzler, P., B, R. A., Ezekowitz & White, K. 1999 Requirement for Croquemort in Phagocytosis of Apoptotic Cells in *Drosophila*. *Science* **284**, 1991–1994. (doi:10.1126/science.284.5422.1991)
53. Gregorio, E. D., Spellman, P. T., Rubin, G. M. & Lemaitre, B. 2001 Genome-wide analysis of the *Drosophila* immune response by using oligonucleotide microarrays. *Proc. Natl. Acad. Sci.* **98**, 12590–12595. (doi:10.1073/pnas.221458698)
54. Buttstedt, A., Moritz, R. F. A. & Emler, S. 2013 Origin and function of the major royal jelly proteins of the honeybee (*Apis mellifera*) as members of the yellow gene family. *Biol. Rev.* , n/a–n/a. (doi:10.1111/brv.12052)
55. Scharlaken, B., De Graaf, D. C., Memmi, S., Devreese, B., Van Beeumen, J. & Jacobs, F. J. 2007 Differential protein expression in the honey bee head after a bacterial challenge. *Arch. Insect Biochem. Physiol.* **65**, 223–237. (doi:10.1002/arch.20179)
56. Amdam, G. V., Simões, Z. L. P., Hagen, A., Norberg, K., Schröder, K., Mikkelsen, Ø., Kirkwood, T. B. L. & Omholt, S. W. 2004 Hormonal control of the yolk precursor vitellogenin regulates immune function and longevity in honeybees. *Exp. Gerontol.* **39**, 767–773. (doi:10.1016/j.exger.2004.02.010)
57. Korner, P. & Schmid-Hempel, P. 2004 In vivo dynamics of an immune response in the bumble bee *Bombus terrestris*. *J. Invertebr. Pathol.* **87**, 59–66.



58. Van Rij, R. P., Saleh, M.-C., Berry, B., Foo, C., Houk, A., Antoniewski, C. & Andino, R. 2006 The RNA silencing endonuclease Argonaute 2 mediates specific antiviral immunity in *Drosophila melanogaster*. *Genes Dev.* **20**, 2985–2995. (doi:10.1101/gad.1482006)
59. Gerardo, N. M. et al. 2010 Immunity and other defenses in pea aphids, *Acyrtosiphon pisum*. *Genome Biol.* **11**, R21. (doi:10.1186/gb-2010-11-2-r21)
60. Ferdig, M. T., Taft, A. S., Smartt, C. T., Lowenberger, C. A., Li, J., Zhang, J. & Christensen, B. M. 2000 *Aedes aegypti* dopa decarboxylase: gene structure and regulation. *Insect Mol. Biol.* **9**, 231–239.
61. Rämets, M., Pearson, A., Manfrulli, P., Li, X., Koziel, H., Göbel, V., Chung, E., Krieger, M. & Ezekowitz, R. A. 2001 *Drosophila* scavenger receptor CI is a pattern recognition receptor for bacteria. *Immunity* **15**, 1027–1038.
62. Tahar, R., Boudin, C., Thiery, I. & Bourgoin, C. 2002 Immune response of *Anopheles gambiae* to the early sporogonic stages of the human malaria parasite *Plasmodium falciparum*. *EMBO J.* **21**, 6673–6680. (doi:10.1093/emboj/cdf664)
63. Cirimotich, C. M., Dong, Y., Garver, L. S., Sim, S. & Dimopoulos, G. 2010 Mosquito immune defenses against *Plasmodium* infection. *Dev. Comp. Immunol.* **34**, 387–395. (doi:10.1016/j.dci.2009.12.005)
64. Ligoxygakis, P., Bulet, P. & Reichhart, J.-M. 2002 Critical evaluation of the role of the Toll-like receptor 18-Wheeler in the host defense of *Drosophila*. *EMBO Rep.* **3**, 666–673. (doi:10.1093/embo-reports/kvf130)
65. Bond, D. & Foley, E. 2009 A quantitative RNAi screen for JNK modifiers identifies Pvr as a novel regulator of *Drosophila* immune signaling. *PLoS Pathog.* **5**, e1000655. (doi:10.1371/journal.ppat.1000655)
66. Corby-Harris, V. et al. 2010 Activation of Akt Signaling Reduces the Prevalence and Intensity of Malaria Parasite Infection and Lifespan in *Anopheles stephensi* Mosquitoes. *PLoS Pathog* **6**, e1001003. (doi:10.1371/journal.ppat.1001003)
67. Kocks, C. et al. 2005 Eater, a Transmembrane Protein Mediating Phagocytosis of Bacterial Pathogens in *Drosophila*. *Cell* **123**, 335–346. (doi:10.1016/j.cell.2005.08.034)
68. Arakane, Y., Muthukrishnan, S., Beeman, R. W., Kanost, M. R. & Kramer, K. J. 2005 Laccase 2 is the phenoloxidase gene required for beetle cuticle tanning. *Proc. Natl. Acad. Sci. U. S. A.* **102**, 11337–11342. (doi:10.1073/pnas.0504982102)
69. Blumberg, B. J., Trop, S., Das, S. & Dimopoulos, G. 2013 Bacteria- and IMD Pathway-Independent Immune Defenses against *Plasmodium falciparum* in *Anopheles gambiae*. *PLoS ONE* **8**. (doi:10.1371/journal.pone.0072130)
70. Vierstraete, E., Verleyen, P., Baggerman, G., D’Hertog, W., Bergh, G. V. den, Arckens, L., Loof, A. D. & Schoofs, L. 2004 A proteomic approach for the analysis of instantly released wound and immune proteins in *Drosophila melanogaster* hemolymph. *Proc. Natl. Acad. Sci. U. S. A.* **101**, 470–475. (doi:10.1073/pnas.0304567101)
71. Mukherjee, T., Kim, W. S., Mandal, L. & Banerjee, U. 2011 Interaction between Notch and Hif- $\alpha$  in development and survival of *Drosophila* blood cells. *Science* **332**, 1210–1213. (doi:10.1126/science.1199643)

72. Watson, F. L., Püttmann-Holgado, R., Thomas, F., Lamar, D. L., Hughes, M., Kondo, M., Rebel, V. I. & Schmucker, D. 2005 Extensive Diversity of Ig-Superfamily Proteins in the Immune System of Insects. *Science* **309**, 1874–1878. (doi:10.1126/science.1116887)
73. Dong, Y. M., Taylor, H. E. & Dimopoulos, G. 2006 AgDscam, a hypervariable immunoglobulin domain-containing receptor of the *Anopheles gambiae* innate immune system. *Plos Biol.* **4**, 1137–1146.
74. Dong, Y., Cirimotich, C. M., Pike, A., Chandra, R. & Dimopoulos, G. 2012 *Anopheles* NF- $\kappa$ B-regulated splicing factors direct pathogen-specific repertoires of the hypervariable pattern recognition receptor AgDscam. *Cell Host Microbe* **12**, 521–530. (doi:10.1016/j.chom.2012.09.004)
75. Weiss, B. L., Wang, J., Maltz, M. A., Wu, Y. & Aksoy, S. 2013 Trypanosome Infection Establishment in the Tsetse Fly Gut Is Influenced by Microbiome-Regulated Host Immune Barriers. *PLoS Pathog* **9**, e1003318. (doi:10.1371/journal.ppat.1003318)
76. Koch, H. & Schmid-Hempel, P. 2011 Socially transmitted gut microbiota protect bumble bees against an intestinal parasite. *Proc. Natl. Acad. Sci.* **108**, 19288–19292. (doi:10.1073/pnas.1110474108)
77. Buchon, N., Broderick, N. A., Chakrabarti, S. & Lemaitre, B. 2009 Invasive and indigenous microbiota impact intestinal stem cell activity through multiple pathways in *Drosophila*. *Genes Dev.* **23**, 2333–2344. (doi:10.1101/gad.1827009)
78. Buchon, N., Broderick, N. A., Poidevin, M., Pradervand, S. & Lemaitre, B. 2009 *Drosophila* Intestinal Response to Bacterial Infection: Activation of Host Defense and Stem Cell Proliferation. *Cell Host Microbe* **5**, 200–211. (doi:10.1016/j.chom.2009.01.003)
79. Narasimhan, S. et al. 2014 Gut Microbiota of the Tick Vector *Ixodes scapularis* Modulate Colonization of the Lyme Disease Spirochete. *Cell Host Microbe* **15**, 58–71. (doi:10.1016/j.chom.2013.12.001)

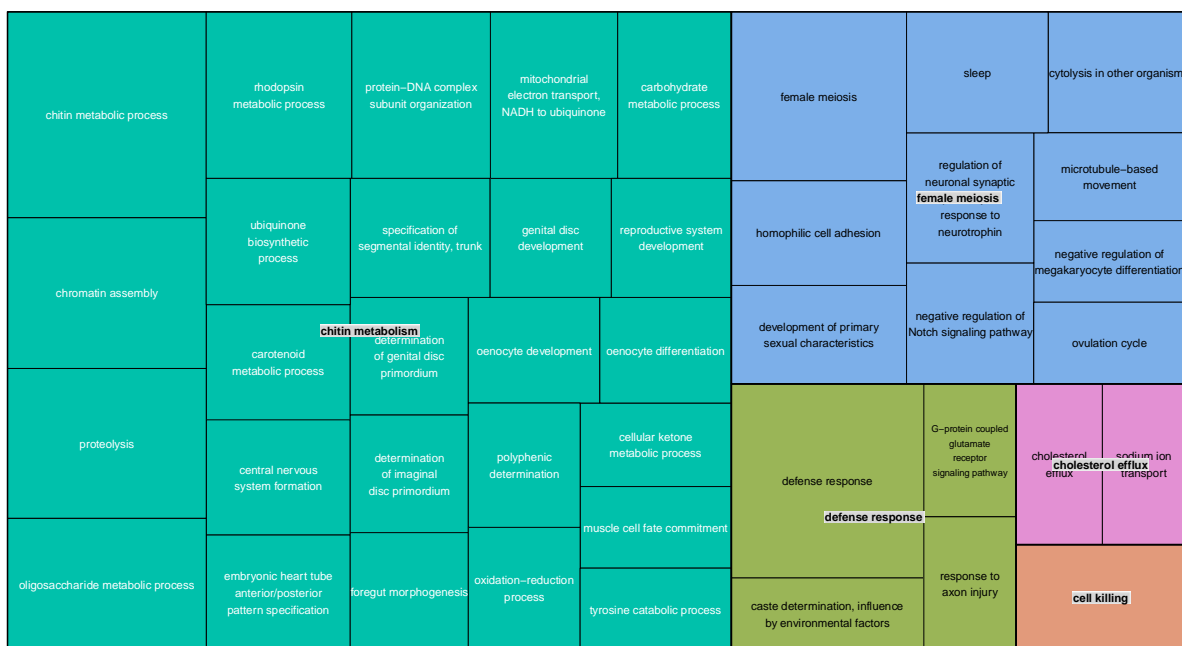

Figure 1 A summary of the enriched GO terms (based on Blast2Go annotation) found for differentially expressed genes at 24 hours post-infection compared to uninfected samples. This figure was produced using Revigo [25]

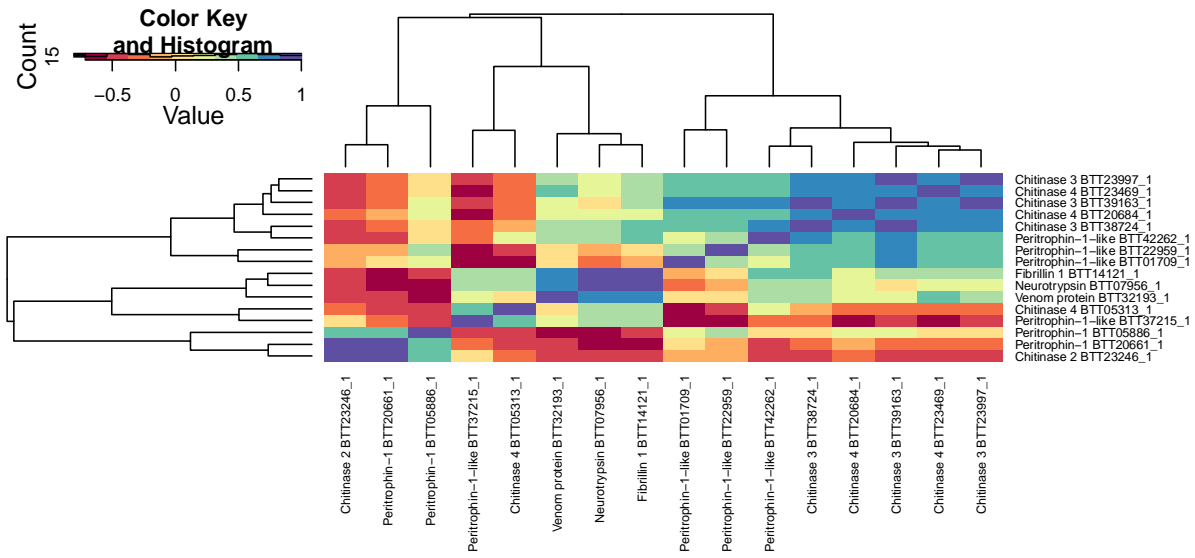

Figure 2. A heatmap showing the correlations of the expression patterns of the transcripts labelled as chitin metabolism genes that were differentially expressed twenty four hours after infection.

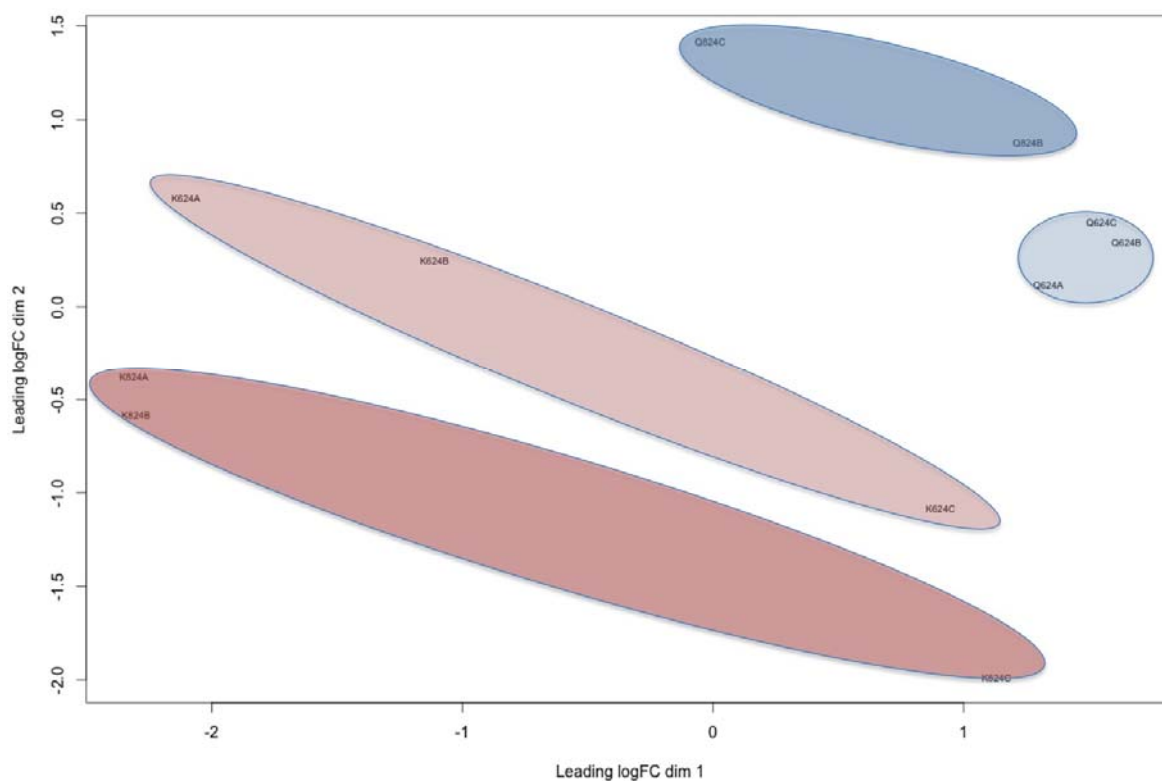

*Figure 3.* A multidimensional scaling (MDS) plot of the 11 samples used in the specificity analysis based on the expression of 591 differentially expressed transcripts. There are two colonies (K (red) and Q (blue)) and two *Crithidia* strains (6 (light) and 8 (dark)). Dimension 1 is the direction that best separates the samples. Dimension 2 is the next best direction, uncorrelated with the first, that separates the samples. The samples are clearly grouped into their colony-strain interactio
